# Supplementary material
Source: Springer Nature journal article supplement (https://www.springermedizin.de/resource/supplementary/12943_2011_1046_MOESM2_ESM.pdf/9552186)

**A**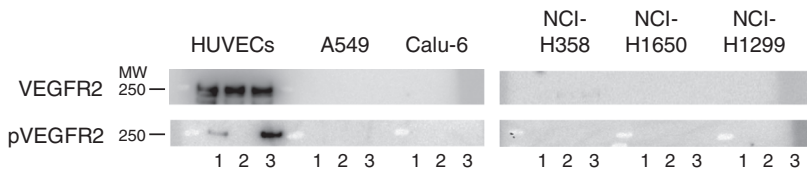**B**

| IC <sub>50</sub> , nM | HUVECs | Non-Small-Cell Lung Cancer Cell Line |        |          |           |           |
|-----------------------|--------|--------------------------------------|--------|----------|-----------|-----------|
|                       |        | A549                                 | Calu-6 | NCI-H358 | NCI-H1650 | NCI-H1299 |
| Motesanib             | 10     | >5000                                | >5000  | >5000    | >5000     | >5000     |
| Docetaxel             | <1     | <10                                  | <10    | <10      | <10       | <50       |

**C**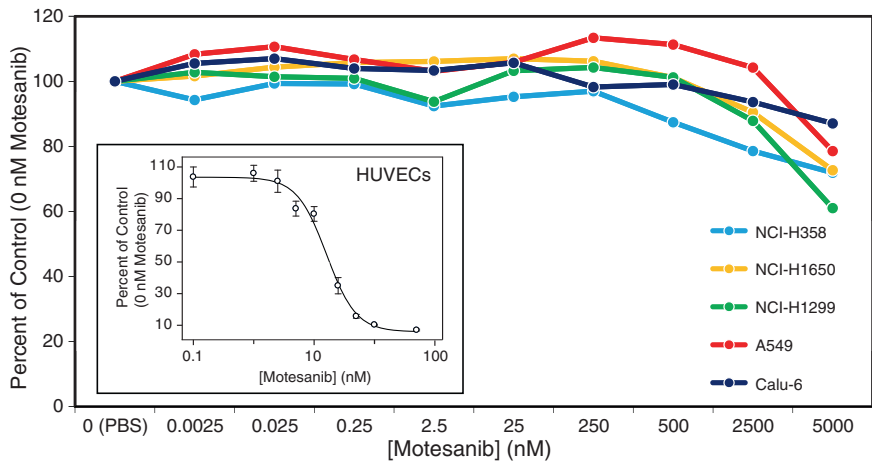

Supplement: MOESM2 [file 9552186]
